# Supplementary material
Source: PubMed Central journal article supplement (PMC2951702)
Supplement: 97320630004463S1.pdf [file 97320630004463S1.pdf]

Supplementary material:

Table 1: Coding Sequences of the First Exon of  $\beta$ -Globin Gene of Eleven Different Species

| #  | Species    | Total | T (%) | C (%) | A (%) | G (%) | GC (%) | Tm (°C) | Sequence                                                                                                |
|----|------------|-------|-------|-------|-------|-------|--------|---------|---------------------------------------------------------------------------------------------------------|
| 1  | Bovine     | 86    | 20.9  | 18.6  | 19.8  | 40.7  | 59.3   | 87.5    | ATGCTGACTGCTGAGGAGAAGGCTGCCGTACCGCCTTTGGGGCAAGGTGAAAGTGGATGAAGTTGGTGGTGAGGCCCTGGGCAG                    |
| 2  | Chimpanzee | 105   | 22.9  | 19    | 19    | 39    | 58     | 87.2    | ATGGTGCACCTGACTCCTGAGGAGAAGTCTGCCGTTACTGCCCTGTGGGCAAGGTGAACGTGGATGAAGTTGGTGGTGAGGCCCTGGGCAGGTTGGTATCAAG |
| 3  | Gallus     | 92    | 16.3  | 26.1  | 20.7  | 37    | 63.1   | 88.8    | ATGGTGCACCTGACTGCTGAGGAGAAGCAGCTCATACCGCCCTCTGGGGCAAGGTCAATGTGGCCGAATGTGGGGCCGAAGCCCTGGCCAG             |
| 4  | Goat       | 86    | 19.8  | 19.8  | 19.8  | 40.7  | 60.5   | 87.9    | ATGCTGACTGCTGAGGAGAAGGCTGCCGTACCGCTTCTGGGGCAAGGTGAAAGTGGATGAAGTTGGTGGTGAGGCCCTGGGCAG                    |
| 5  | Gorilla    | 93    | 21.5  | 20.4  | 18.3  | 39.8  | 60.2   | 87.7    | ATGGTGCACCTGACTCCTGAGGAGAAGTCTGCCGTTACTGCCCTGTGGGGCAAGGTGAACGTGGATGAAGTTGGTGGTGAGGCCCTGGGCAGG           |
| 6  | Human      | 92    | 22.8  | 20.7  | 18.5  | 38    | 58.7   | 87.3    | ATGGTGCACCTGACTCCTGAGGAGAAGTCTGCCGTTACTGCCCTGTGGGGCAAGGTGAACGTGGATGAAGTTGGTGGTGAGGCCCTGGGCAG            |
| 7  | Lemur      | 92    | 25    | 16.3  | 20.7  | 38    | 54.3   | 85.2    | ATGACTTGTGAGTGTGAGGAGAATGCTCATGTCACTCTCTGTGGGGCAAGGTGGATGTAGAGAAAGTTGGTGGCGAGGCCCTGGGCAG                |
| 8  | Mouse      | 94    | 24.5  | 21.3  | 18.1  | 36.2  | 57.5   | 86.5    | ATGGTGCACCTGACTGATGCTGAGAAGTCTGCTGTCTTCTGCCCTGTGGGGCAAGGTGAACCCCGATGAAGTTGGTGGTGAGGCCCTGGGCAGG          |
| 9  | Opossum    | 92    | 23.9  | 21.7  | 22.8  | 31.5  | 53.2   | 84.9    | ATGGTGCACCTGACTCCTGAGGAGAAGTCTGCCGTTACTGCCCTGTGGGGCAAGGTGAACGTGGATGAAGTTGGTGGTGAGGCCCTGGGCAG            |
| 10 | Rabbit     | 90    | 22.2  | 17.8  | 18.9  | 41.1  | 58.9   | 86.7    | ATGGTGCATCTGTCCAGTGAAGTCTGCCGTTACTGCCCTGTGGGGCAAGGTGAACGTGGATGAAGTTGGTGGTGAGGCCCTGGGCAG                 |
| 11 | Rat        | 92    | 22.8  | 19.6  | 21.7  | 35.9  | 55.5   | 86.9    | ATGGTGCACCTAAGTGTGCTGAGAAGGCTACTGTTAGTGGCCTGTGGGGCAAGGTGAACCCGTGATAATGTTGGCGCTGAGGCCCTGGGCAG            |

List of Protein Accession numbers for class II  $\alpha$ -chains of MHC proteins

>HumanDRA\_M60334.mhctab2seq; >MacacaDRA\_L27739.mhctab2seq; >CowDRA\_D37956.mhctab2seq; >SheepDRA\_M73983.mhctab2seq; >DogDRA\_L37332.mhctab2seq; >RatEA\_Y00480.mhctab2seq; >PigDRA\_M93028.mhctab2seq; >HorseDRA\_M60100.mhctab2seq; >RabbitDRA\_M28161.mhctab2seq; >WallabyDRA\_U18109.mhctab2seq; >HumanDQA\_M26041.mhctab2seq; >CowDQA\_D50045.mhctab2seq; >SheepDQA\_M93430.mhctab2seq; >DogDQA\_U42407.mhctab2seq; >MouseAA\_M21931.mhctab2seq; >RatBA\_X14879.mhctab2seq; >PigDQA\_M29938.mhctab2seq; >HorseDQA\_L33909.mhctab2seq; >RabbitDQA\_M15557.mhctab2seq; >HumanDPA\_M27487.mhctab2seq; >RatPA\_S80415.mhctab2seq; >RabbitDPA\_M22640.mhctab2seq; >HumanDNA\_M26039.mhctab2seq; >SheepDNA\_Z29533.mhctab2seq; >MouseNA\_M95514.mhctab2seq; >WallabyDNA\_U18110.mhctab2seq; >ZfishA\_L19445.mhctab2seq; >ZfishA\_L19446.mhctab2seq; >ZfishA\_L19450.mhctab2seq; >ZfishA\_L19451.mhctab2seq; >SharkA\_M89950.mhctab2seq
